# Supplementary material for: The use of strain, strain rate, and displacement by 2D speckle tracking for assessment of systolic left ventricular function in goats: applicability and influence of general anesthesia
Source: Springer Nature journal article supplement (doi:10.1186/s12947-015-0005-8), 2015-03-16
Supplement: MOESM1 [file 9763380]

## Additional file 1

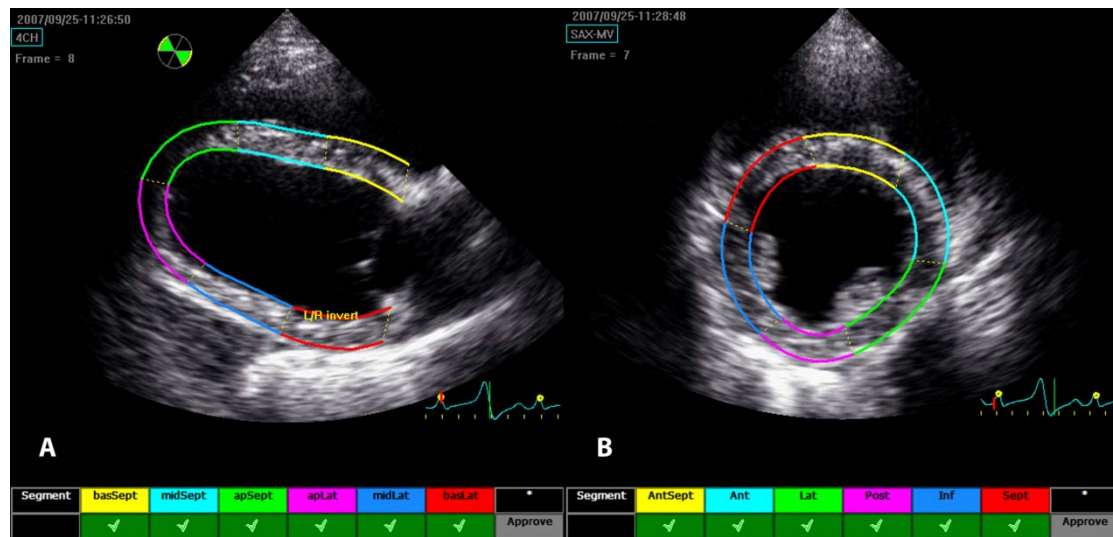

**Figure S5 – Two-dimensional Speckle Tracking Analysis Tool**

Two-dimensional speckle tracking analysis tool. The 2DST software automatically divides the region of interest into 6 segments. The quality of tracking is automatically verified by the software and segments with appropriate tracking are marked with a green “V” at the bottom of the screen.

**A:** Right-parasternal long-axis view of the left ventricle. The interventricular septum and the left ventricular free wall are divided into basal, mid-wall and apical segments.

**B:** Right-parasternal short-axis view at the level of the chordae tendineae. Note that the labels assigned to the short-axis segments are based on the human echocardiographic nomenclature and do not directly correspond to the anatomy of the goat heart. “Sept”, “AntSept” and “Ant” generally depict the interventricular septum, whereas “Lat”, “Post” and “Inf” depict the cranial, lateral, and caudal LV free wall.

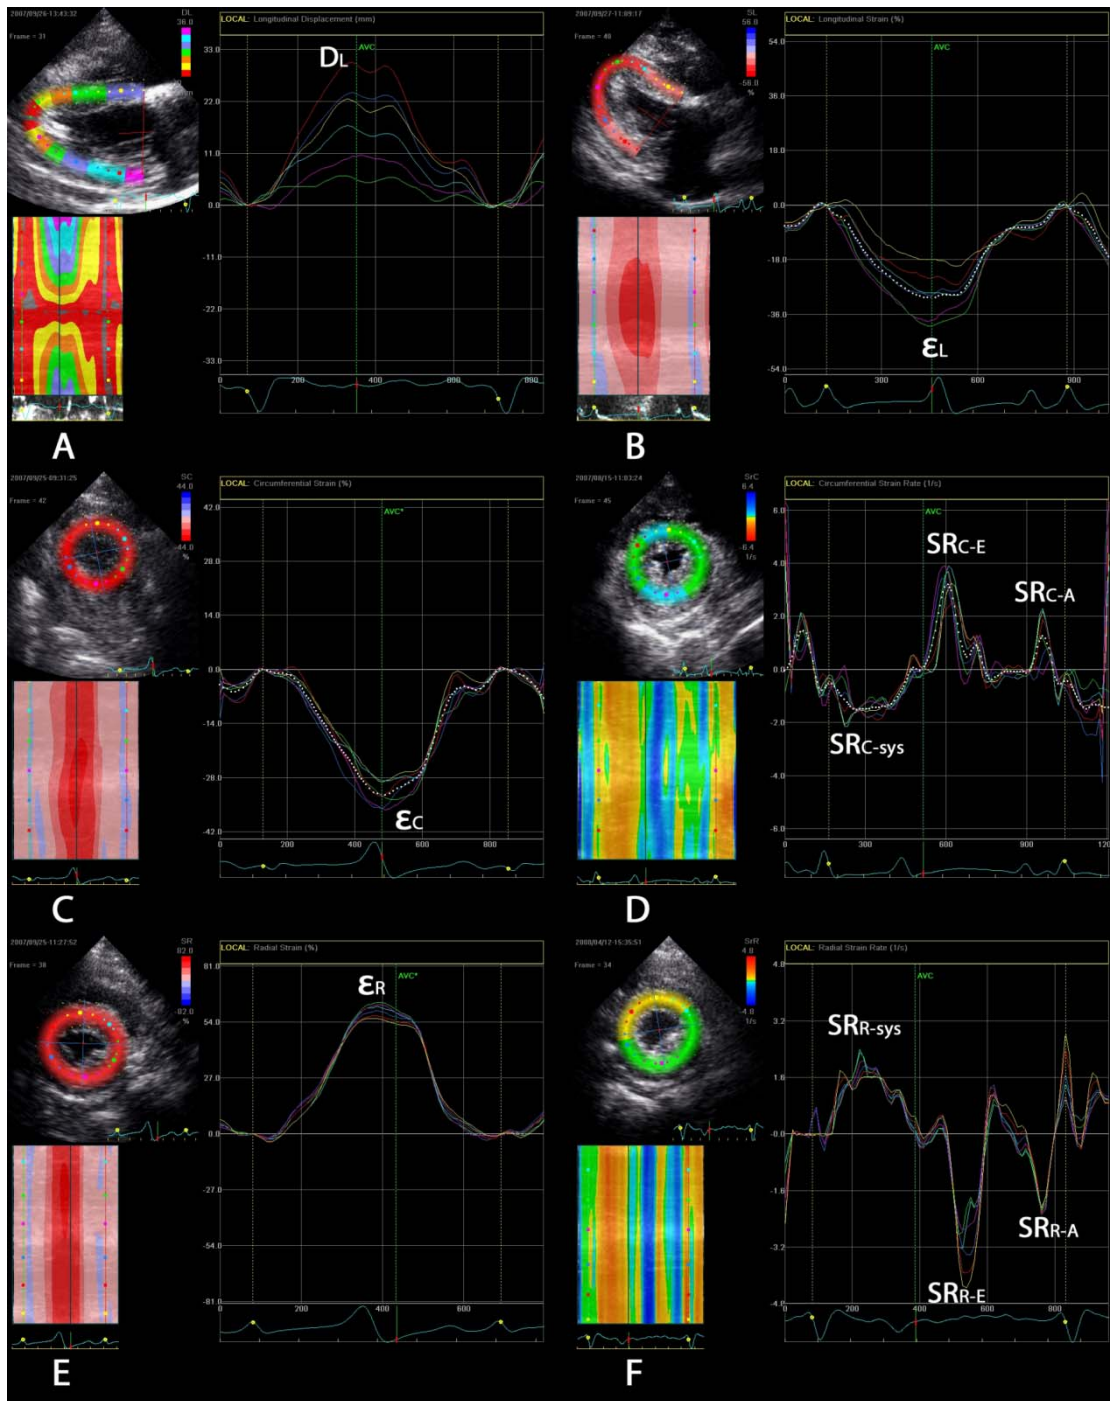

**Figure S6 – Two-dimensional Speckle Tracking Trace Screens**

Examples of trace screens of the 2DST analysis tool displaying the following information: Top left: 2D image with the segmented ROI and parametric color coding at the time of aortic valve closure. The center and the endocardial and epicardial borders of the different myocardial segments are marked by colored dots. Bottom left: M-mode with parametric color coding, showing the spatial (vertical axis) and temporal (horizontal axis) distribution of the respective measurements. The different

myocardial segments are marked by colored dots. An ECG is plotted for timing. Right: Trace display for the selected variable. The colors of the traces correspond to the colors of the segmented ROI. The dotted line (where shown) indicates the instantaneous average of all segments at the respective time of the cardiac cycle. An ECG is plotted for timing. The start and the end of the cycle are marked on the ECG with yellow dots. The automatically calculated time of aortic valve closure (AVC) is indicated by a green vertical line, dividing the cycle in its systolic and diastolic component.

**A:** Longitudinal displacement.  $D_L$ , longitudinal peak displacement. **B:** Longitudinal strain.  $\epsilon_L$ , longitudinal peak strain. **C:** Circumferential strain.  $\epsilon_c$ , circumferential peak strain. **D:** Circumferential strain rate.  $SR_{C-sys}$ , circumferential peak systolic strain rate;  $SR_{C-E}$ , circumferential peak early-diastolic strain rate;  $SR_{C-A}$ , circumferential peak late-diastolic strain rate. **E:** Radial strain.  $\epsilon_R$ , radial peak strain. **F:** Radial strain rate.  $SR_{R-sys}$ , radial peak systolic strain rate;  $SR_{R-E}$ , radial peak early-diastolic strain rate;  $SR_{R-A}$ , radial peak late-diastolic strain rate.

**Table S5 – Segmental 2DST analyses of left ventricular long-axis and short-axis recordings under awake and anesthetized conditions**

| Variable            | Treatment    | Units | Segments                |                         |                        |                       |                        |                        | p value Treatment | F-Test           |                              |
|---------------------|--------------|-------|-------------------------|-------------------------|------------------------|-----------------------|------------------------|------------------------|-------------------|------------------|------------------------------|
|                     |              |       | basSept<br>[mean ± SEM] | midSept<br>[mean ± SEM] | apSept<br>[mean ± SEM] | apLat<br>[mean ± SEM] | midLat<br>[mean ± SEM] | basLat<br>[mean ± SEM] |                   | p value Segments | p value Treatment × Segments |
| <b>LAX</b>          |              |       |                         |                         |                        |                       |                        |                        |                   |                  |                              |
| $\epsilon_{L-sys}$  | Awake        | %     | -17.12 ± 0.64           | -26.06 ± 0.64           | -35.91 ± 0.64          | -34.62 ± 0.64         | -23.38 ± 0.64          | -18.04 ± 0.68          | 0.121             | <0.001           | 0.548                        |
|                     | Anesthetized |       | -17.22 ± 0.68           | -26.48 ± 0.64           | -36.99 ± 0.64          | -35.04 ± 0.64         | -24.68 ± 0.64          | -20.43 ± 0.64          |                   |                  |                              |
| $\epsilon_L$        | Awake        | %     | -18.78 ± 0.56           | -26.49 ± 0.56           | -36.02 ± 0.56          | -34.84 ± 0.56         | -25.11 ± 0.56          | -22.31 ± 0.59          | 0.022             | <0.001           | 0.603                        |
|                     | Anesthetized |       | -19.60 ± 0.59           | -27.56 ± 0.56           | -37.07 ± 0.56          | -35.10 ± 0.56         | -26.66 ± 0.56          | -24.57 ± 0.56          |                   |                  |                              |
| SR <sub>L-sys</sub> | Awake        | 1/s   | -1.64 ± 0.09            | -2.09 ± 0.09            | -2.85 ± 0.09           | -2.81 ± 0.09          | -2.03 ± 0.09           | -2.06 ± 0.09           | <0.001            | <0.001           | 0.451                        |
|                     | Anesthetized |       | -1.37 ± 0.09            | -1.83 ± 0.09            | -2.48 ± 0.09           | -2.33 ± 0.09          | -1.78 ± 0.09           | -1.89 ± 0.09           |                   |                  |                              |
| SR <sub>L-E</sub>   | Awake        | 1/s   | 1.74 ± 0.12             | 2.24 ± 0.12             | 4.10 ± 0.12            | 4.12 ± 0.12           | 2.48 ± 0.12            | 2.77 ± 0.13            | 0.323             | <0.001           | 0.250                        |
|                     | Anesthetized |       | 1.51 ± 0.13             | 2.47 ± 0.12             | 4.42 ± 0.12            | 4.26 ± 0.12           | 2.75 ± 0.12            | 2.99 ± 0.12            |                   |                  |                              |
| SR <sub>L-A</sub>   | Awake        | 1/s   | 1.53 ± 0.13             | 1.55 ± 0.13             | 2.08 ± 0.13            | 2.38 ± 0.13           | 1.76 ± 0.13            | 2.22 ± 0.13            | 0.040             | <0.001           | 0.135                        |
|                     | Anesthetized |       | 1.52 ± 0.13             | 1.24 ± 0.13             | 1.65 ± 0.13            | 1.72 ± 0.13           | 1.35 ± 0.13            | 1.58 ± 0.13            |                   |                  |                              |
| DL                  | Awake        | mm    | 20.90 ± 0.37            | 15.68 ± 0.37            | 6.65 ± 0.37            | 7.57 ± 0.37           | 18.55 ± 0.37           | 24.41 ± 0.37           | 0.315             | <0.001           | <0.001                       |
|                     | Anesthetized |       | 19.73 ± 0.37            | 14.55 ± 0.37            | 5.65 ± 0.42            | 8.91 ± 0.37           | 20.47 ± 0.37           | 27.15 ± 0.37           |                   |                  |                              |
| DT                  | Awake        | mm    | 3.07 ± 0.26             | 4.54 ± 0.26             | 4.27 ± 0.26            | 3.97 ± 0.26           | 5.43 ± 0.26            | 8.76 ± 0.26            | 0.011             | <0.001           | 0.123                        |
|                     | Anesthetized |       | 3.44 ± 0.27             | 4.90 ± 0.26             | 4.85 ± 0.26            | 5.10 ± 0.26           | 7.03 ± 0.26            | 9.65 ± 0.26            |                   |                  |                              |

| Variable            | Treatment    | Units | Segments                |                     |                     |                      |                     |                      | F-Test               |                     |                                    |  |
|---------------------|--------------|-------|-------------------------|---------------------|---------------------|----------------------|---------------------|----------------------|----------------------|---------------------|------------------------------------|--|
|                     |              |       | AntSept<br>[mean ± SEM] | Ant<br>[mean ± SEM] | Lat<br>[mean ± SEM] | Post<br>[mean ± SEM] | Inf<br>[mean ± SEM] | Sept<br>[mean ± SEM] | p value<br>Treatment | p value<br>Segments | p value<br>Treatment<br>× Segments |  |
| <b>SAX-AP</b>       |              |       |                         |                     |                     |                      |                     |                      |                      |                     |                                    |  |
| $\epsilon_{C-sys}$  | Awake        | %     | -19.47 ± 0.90           | -18.61 ± 0.90       | -20.04 ± 0.90       | -27.19 ± 0.90        | -27.38 ± 0.90       | -22.64 ± 0.90        | 0.011                | <0.001              | <0.001                             |  |
|                     | Anesthetized |       | -24.82 ± 0.90           | -20.12 ± 0.95       | -19.94 ± 0.95       | -26.34 ± 0.95        | -28.97 ± 0.90       | -28.34 ± 0.90        |                      |                     |                                    |  |
| $\epsilon_C$        | Awake        | %     | -20.44 ± 0.88           | -19.54 ± 0.88       | -19.677 ± 0.88      | -27.53 ± 0.88        | -27.46 ± 0.88       | -22.67 ± 0.88        | 0.005                | <0.001              | 0.005                              |  |
|                     | Anesthetized |       | -25.15 ± 0.88           | -21.33 ± 0.93       | -20.78 ± 0.93       | -26.87 ± 0.93        | -29.05 ± 0.88       | -28.48 ± 0.88        |                      |                     |                                    |  |
| $\epsilon_{R-sys}$  | Awake        | %     | 52.02 ± 1.43            | 53.31 ± 1.43        | 55.77 ± 1.43        | 56.51 ± 1.43         | 56.07 ± 1.43        | 54.54 ± 1.43         | 0.828                | 0.521               | 0.581                              |  |
|                     | Anesthetized |       | 55.48 ± 1.43            | 55.28 ± 1.43        | 55.92 ± 1.43        | 55.24 ± 1.43         | 55.36 ± 1.43        | 55.56 ± 1.43         |                      |                     |                                    |  |
| $\epsilon_R$        | Awake        | %     | 56.54 ± 1.50            | 56.29 ± 1.50        | 58.03 ± 1.50        | 59.28 ± 1.50         | 59.65 ± 1.50        | 58.99 ± 1.50         | 0.932                | 0.493               | 0.915                              |  |
|                     | Anesthetized |       | 58.59 ± 1.50            | 57.51 ± 1.50        | 58.02 ± 1.50        | 58.69 ± 1.50         | 58.65 ± 1.50        | 58.97 ± 1.50         |                      |                     |                                    |  |
| SR <sub>C-sys</sub> | Awake        | 1/s   | -1.75 ± 0.08            | -1.89 ± 0.08        | -1.94 ± 0.08        | -2.51 ± 0.08         | -2.53 ± 0.08        | -2.20 ± 0.08         | 0.013                | <0.001              | 0.173                              |  |
|                     | Anesthetized |       | -1.69 ± 0.08            | -1.58 ± 0.08        | -1.67 ± 0.08        | -2.13 ± 0.08         | -2.09 ± 0.08        | -1.98 ± 0.08         |                      |                     |                                    |  |
| SR <sub>C-E</sub>   | Awake        | 1/s   | 2.90 ± 0.15             | 3.06 ± 0.15         | 2.88 ± 0.15         | 3.11 ± 0.15          | 2.61 ± 0.15         | 2.98 ± 0.15          | 0.112                | 0.010               | 0.074                              |  |
|                     | Anesthetized |       | 3.31 ± 0.15             | 3.10 ± 0.15         | 2.66 ± 0.16         | 3.59 ± 0.16          | 3.14 ± 0.15         | 3.45 ± 0.15          |                      |                     |                                    |  |
| SR <sub>C-A</sub>   | Awake        | 1/s   | 1.41 ± 0.12             | 1.18 ± 0.12         | 1.07 ± 0.12         | 1.59 ± 0.12          | 1.81 ± 0.12         | 1.83 ± 0.12          | 0.052                | <0.001              | 0.045                              |  |
|                     | Anesthetized |       | 1.26 ± 0.12             | 0.80 ± 0.12         | 0.92 ± 0.12         | 0.96 ± 0.12          | 1.05 ± 0.12         | 1.50 ± 0.12          |                      |                     |                                    |  |
| SR <sub>R-sys</sub> | Awake        | 1/s   | 2.21 ± 0.05             | 2.34 ± 0.05         | 2.39 ± 0.05         | 2.43 ± 0.05          | 2.40 ± 0.05         | 2.28 ± 0.05          | 0.088                | 0.009               | 0.865                              |  |
|                     | Anesthetized |       | 2.04 ± 0.05             | 2.11 ± 0.05         | 2.14 ± 0.05         | 2.19 ± 0.05          | 2.14 ± 0.05         | 2.12 ± 0.05          |                      |                     |                                    |  |
| SR <sub>R-E</sub>   | Awake        | 1/s   | -2.90 ± 0.11            | -2.90 ± 0.11        | -2.81 ± 0.11        | -2.72 ± 0.11         | -2.73 ± 0.11        | -2.80 ± 0.11         | 0.888                | 0.869               | 0.676                              |  |
|                     | Anesthetized |       | -2.91 ± 0.11            | -2.71 ± 0.11        | -2.82 ± 0.11        | -2.90 ± 0.11         | -2.82 ± 0.11        | -2.88 ± 0.11         |                      |                     |                                    |  |
| SR <sub>R-A</sub>   | Awake        | 1/s   | -1.87 ± 0.06            | -1.99 ± 0.06        | -2.08 ± 0.06        | -2.19 ± 0.06         | -2.26 ± 0.06        | -2.19 ± 0.06         | 0.031                | 0.056               | 0.087                              |  |
|                     | Anesthetized |       | -1.34 ± 0.06            | -1.32 ± 0.06        | -1.35 ± 0.06        | -1.32 ± 0.06         | -1.40 ± 0.06        | -1.41 ± 0.06         |                      |                     |                                    |  |
| DR                  | Awake        | mm    | 6.47 ± 0.26             | 7.73 ± 0.26         | 8.08 ± 0.26         | 7.56 ± 0.26          | 7.26 ± 0.26         | 6.71 ± 0.26          | <0.001               | <0.001              | <0.001                             |  |
|                     | Anesthetized |       | 6.98 ± 0.26             | 8.56 ± 0.26         | 10.41 ± 0.26        | 10.98 ± 0.26         | 9.06 ± 0.26         | 7.25 ± 0.26          |                      |                     |                                    |  |

| Variable              | Treatment    | Units | Segments                |                     |                     |                      |                     |                      | p value Treatment | F-Test           |                              |
|-----------------------|--------------|-------|-------------------------|---------------------|---------------------|----------------------|---------------------|----------------------|-------------------|------------------|------------------------------|
|                       |              |       | AntSept<br>[mean ± SEM] | Ant<br>[mean ± SEM] | Lat<br>[mean ± SEM] | Post<br>[mean ± SEM] | Inf<br>[mean ± SEM] | Sept<br>[mean ± SEM] |                   | p value Segments | p value Treatment × Segments |
| <b>SAX-PM</b>         |              |       |                         |                     |                     |                      |                     |                      |                   |                  |                              |
| $\varepsilon_{C-sys}$ | Awake        | %     | -20.13 ± 0.99           | -18.69 ± 1.17       | -19.032 ± 1.11      | -24.66 ± 0.99        | -25.73 ± 0.99       | -22.67 ± 0.99        | 0.059             | <0.001           | <0.001                       |
|                       | Anesthetized |       | -28.59 ± 0.99           | -21.46 ± 0.99       | -16.60 ± 0.99       | -19.24 ± 0.99        | -25.60 ± 0.99       | -28.94 ± 0.99        |                   |                  |                              |
| $\varepsilon_C$       | Awake        | %     | -20.96 ± 0.93           | -20.85 ± 1.10       | -19.90 ± 1.04       | -24.63 ± 0.93        | -25.76 ± 0.93       | -22.99 ± 0.93        | 0.041             | <0.001           | <0.001                       |
|                       | Anesthetized |       | -28.64 ± 0.93           | -22.37 ± 0.93       | -17.85 ± 0.93       | -20.24 ± 0.93        | -25.82 ± 0.93       | -29.77 ± 0.93        |                   |                  |                              |
| $\varepsilon_{R-sys}$ | Awake        | %     | 47.12 ± 1.53            | 52.67 ± 1.53        | 59.43 ± 1.53        | 61.11 ± 1.53         | 58.25 ± 1.53        | 52.72 ± 1.53         | 0.122             | <0.001           | 0.432                        |
|                       | Anesthetized |       | 52.81 ± 1.53            | 56.43 ± 1.53        | 63.92 ± 1.53        | 67.27 ± 1.53         | 67.67 ± 1.53        | 60.80 ± 1.53         |                   |                  |                              |
| $\varepsilon_R$       | Awake        | %     | 50.59 ± 1.51            | 55.99 ± 1.51        | 62.08 ± 1.51        | 63.39 ± 1.51         | 60.30 ± 1.51        | 56.31 ± 1.51         | 0.155             | <0.001           | 0.169                        |
|                       | Anesthetized |       | 55.45 ± 1.51            | 59.10 ± 1.51        | 65.05 ± 1.51        | 69.28 ± 1.51         | 69.84 ± 1.51        | 64.55 ± 1.51         |                   |                  |                              |
| SR <sub>C-sys</sub>   | Awake        | 1/s   | -1.60 ± 0.08            | -1.90 ± 0.10        | -1.87 ± 0.09        | -2.37 ± 0.08         | -2.48 ± 0.08        | -2.08 ± 0.08         | 0.004             | <0.001           | <0.001                       |
|                       | Anesthetized |       | -1.89 ± 0.08            | -1.64 ± 0.08        | -1.40 ± 0.08        | -1.79 ± 0.08         | -2.18 ± 0.08        | -2.03 ± 0.08         |                   |                  |                              |
| SR <sub>C-E</sub>     | Awake        | 1/s   | 2.08 ± 0.12             | 3.33 ± 0.14         | 3.08 ± 0.14         | 3.74 ± 0.12          | 2.89 ± 0.12         | 2.95 ± 0.12          | 0.713             | <0.001           | <0.001                       |
|                       | Anesthetized |       | 3.46 ± 0.12             | 2.95 ± 0.12         | 2.46 ± 0.12         | 3.53 ± 0.12          | 3.38 ± 0.12         | 3.33 ± 0.12          |                   |                  |                              |
| SR <sub>C-A</sub>     | Awake        | 1/s   | 1.22 ± 0.09             | 1.34 ± 0.10         | 1.12 ± 0.10         | 1.29 ± 0.09          | 1.26 ± 0.09         | 1.50 ± 0.09          | 0.137             | 0.034            | 0.089                        |
|                       | Anesthetized |       | 1.33 ± 0.09             | 1.07 ± 0.09         | 0.92 ± 0.09         | 0.89 ± 0.09          | 0.98 ± 0.09         | 1.24 ± 0.09          |                   |                  |                              |
| SR <sub>R-sys</sub>   | Awake        | 1/s   | 2.19 ± 0.07             | 2.57 ± 0.07         | 2.71 ± 0.07         | 2.63 ± 0.07          | 2.56 ± 0.07         | 2.30 ± 0.07          | 0.016             | <0.001           | 0.002                        |
|                       | Anesthetized |       | 2.08 ± 0.07             | 2.17 ± 0.07         | 2.16 ± 0.07         | 2.27 ± 0.07          | 2.34 ± 0.07         | 2.26 ± 0.07          |                   |                  |                              |
| SR <sub>R-E</sub>     | Awake        | 1/s   | -2.66 ± 0.07            | -2.71 ± 0.07        | -2.81 ± 0.07        | -2.86 ± 0.07         | -2.82 ± 0.07        | -2.72 ± 0.07         | 0.789             | 0.011            | 0.743                        |
|                       | Anesthetized |       | -2.64 ± 0.07            | -2.68 ± 0.07        | -2.89 ± 0.07        | -3.02 ± 0.07         | -2.90 ± 0.07        | -2.71 ± 0.07         |                   |                  |                              |
| SR <sub>R-A</sub>     | Awake        | 1/s   | -1.53 ± 0.13            | -1.64 ± 0.13        | -1.71 ± 0.13        | -1.63 ± 0.13         | -2.07 ± 0.13        | -2.00 ± 0.13         | 0.045             | 0.006            | 0.927                        |
|                       | Anesthetized |       | -1.23 ± 0.13            | -1.28 ± 0.13        | -1.35 ± 0.13        | -1.40 ± 0.14         | -1.55 ± 0.14        | -1.58 ± 0.48         |                   |                  |                              |
| DR                    | Awake        | mm    | 5.29 ± 0.29             | 6.04 ± 0.29         | 7.63 ± 0.29         | 8.70 ± 0.29          | 8.93 ± 0.29         | 7.41 ± 0.29          | <0.001            | <0.001           | <0.001                       |
|                       | Anesthetized |       | 5.64 ± 0.29             | 7.00 ± 0.29         | 10.66 ± 0.29        | 12.90 ± 0.29         | 11.72 ± 0.29        | 8.21 ± 0.29          |                   |                  |                              |

| Variable              | Treatment    | Units | Segments                |                     |                     |                      |                     |                      | p value Treatment | F-Test           |                              |  |
|-----------------------|--------------|-------|-------------------------|---------------------|---------------------|----------------------|---------------------|----------------------|-------------------|------------------|------------------------------|--|
|                       |              |       | AntSept<br>[mean ± SEM] | Ant<br>[mean ± SEM] | Lat<br>[mean ± SEM] | Post<br>[mean ± SEM] | Inf<br>[mean ± SEM] | Sept<br>[mean ± SEM] |                   | p value Segments | p value Treatment × Segments |  |
| <b>SAX-CH</b>         |              |       |                         |                     |                     |                      |                     |                      |                   |                  |                              |  |
| $\varepsilon_{C-sys}$ | Awake        | %     | -22.00 ± 1.01           | -18.26 ± 1.07       | -18.33 ± 1.22       | -19.57 ± 1.07        | -23.72 ± 1.01       | -23.74 ± 1.01        | 0.001             | <0.001           | <0.001                       |  |
|                       | Anesthetized |       | -29.82 ± 1.01           | -22.47 ± 1.01       | -16.77 ± 1.07       | -19.10 ± 1.30        | -25.03 ± 1.01       | -30.46 ± 1.01        |                   |                  |                              |  |
| $\varepsilon_C$       | Awake        | %     | -22.50 ± 1.04           | -19.75 ± 1.11       | -19.31 ± 1.26       | -19.69 ± 1.11        | -23.47 ± 1.04       | -29.94 ± 1.04        | 0.001             | <0.001           | <0.001                       |  |
|                       | Anesthetized |       | -29.94 ± 1.04           | -23.59 ± 1.04       | -18.14 ± 1.11       | -19.61 ± 1.34        | -25.34 ± 1.04       | -30.53 ± 1.04        |                   |                  |                              |  |
| $\varepsilon_{R-sys}$ | Awake        | %     | 40.07 ± 1.76            | 46.01 ± 1.76        | 58.08 ± 1.76        | 62.07 ± 1.76         | 60.27 ± 1.76        | 60.27 ± 1.76         | 0.189             | <0.001           | 0.036                        |  |
|                       | Anesthetized |       | 51.94 ± 1.76            | 53.09 ± 1.76        | 60.04 ± 1.76        | 65.99 ± 1.76         | 66.30 ± 1.76        | 61.42 ± 1.76         |                   |                  |                              |  |
| $\varepsilon_R$       | Awake        | %     | 43.94 ± 1.66            | 50.07 ± 1.66        | 62.05 ± 1.66        | 66.20 ± 1.66         | 64.15 ± 1.66        | 56.56 ± 1.66         | 0.17              | <0.001           | 0.083                        |  |
|                       | Anesthetized |       | 55.01 ± 1.66            | 56.12 ± 1.66        | 63.97 ± 1.66        | 69.73 ± 1.66         | 70.08 ± 1.66        | 65.23 ± 1.66         |                   |                  |                              |  |
| $SR_{C-sys}$          | Awake        | 1/s   | -1.81 ± 0.07            | -1.85 ± 0.08        | -1.97 ± 0.09        | -2.33 ± 0.08         | -2.62 ± 0.07        | -2.08 ± 0.07         | 0.005             | <0.001           | <0.001                       |  |
|                       | Anesthetized |       | -1.96 ± 0.07            | -1.73 ± 0.07        | -1.45 ± 0.08        | -1.69 ± 0.09         | -1.92 ± 0.07        | -2.00 ± 0.07         |                   |                  |                              |  |
| $SR_{C-E}$            | Awake        | 1/s   | 2.90 ± 0.14             | 2.88 ± 0.15         | 3.04 ± 0.17         | 3.60 ± 0.15          | 3.48 ± 0.14         | 2.72 ± 0.14          | 0.259             | <0.001           | <0.001                       |  |
|                       | Anesthetized |       | 3.61 ± 0.14             | 3.20 ± 0.14         | 2.42 ± 0.15         | 3.46 ± 0.18          | 3.76 ± 0.14         | 3.42 ± 0.14          |                   |                  |                              |  |
| $SR_{C-A}$            | Awake        | 1/s   | 1.36 ± 0.09             | 1.33 ± 0.10         | 1.37 ± 0.11         | 1.23 ± 0.10          | 1.20 ± 0.09         | 1.46 ± 0.09          | 0.214             | 0.147            | 0.296                        |  |
|                       | Anesthetized |       | 1.30 ± 0.09             | 1.06 ± 0.09         | 0.90 ± 0.09         | 1.11 ± 0.11          | 1.11 ± 0.09         | 1.37 ± 0.09          |                   |                  |                              |  |
| $SR_{R-sys}$          | Awake        | 1/s   | 2.25 ± 0.07             | 2.52 ± 0.07         | 2.71 ± 0.07         | 2.72 ± 0.07          | 2.76 ± 0.07         | 2.50 ± 0.07          | 0.213             | <0.001           | 0.05                         |  |
|                       | Anesthetized |       | 2.19 ± 0.07             | 2.14 ± 0.07         | 2.32 ± 0.07         | 2.39 ± 0.07          | 2.48 ± 0.07         | 2.43 ± 0.07          |                   |                  |                              |  |
| $SR_{R-E}$            | Awake        | 1/s   | -2.75 ± 0.10            | -2.68 ± 0.10        | -2.97 ± 0.10        | -3.27 ± 0.10         | -3.34 ± 0.10        | -3.10 ± 0.10         | 0.318             | <0.001           | 0.055                        |  |
|                       | Anesthetized |       | -2.79 ± 0.10            | -2.70 ± 0.10        | -2.73 ± 0.10        | -2.88 ± 0.10         | -2.89 ± 0.10        | -2.76 ± 0.10         |                   |                  |                              |  |
| $SR_{R-A}$            | Awake        | 1/s   | -1.58 ± 0.09            | -1.52 ± 0.09        | -1.74 ± 0.09        | -1.90 ± 0.09         | -1.92 ± 0.09        | -1.83 ± 0.09         | 0.451             | <0.001           | 0.894                        |  |
|                       | Anesthetized |       | -1.35 ± 0.09            | -1.48 ± 0.09        | -1.66 ± 0.09        | -1.68 ± 0.09         | -1.76 ± 0.09        | -1.66 ± 0.09         |                   |                  |                              |  |
| DR                    | Awake        | mm    | 4.08 ± 0.26             | 4.13 ± 0.26         | 7.12 ± 0.26         | 9.68 ± 0.26          | 9.95 ± 0.26         | 7.59 ± 0.27          | <0.001            | <0.001           | <0.001                       |  |
|                       | Anesthetized |       | 4.83 ± 0.26             | 6.03 ± 0.26         | 10.21 ± 0.26        | 13.49 ± 0.26         | 12.39 ± 0.26        | 8.55 ± 0.26          |                   |                  |                              |  |

$\epsilon_{L-sys}$  longitudinal peak systolic strain;  $\epsilon_L$ , longitudinal peak strain;  $SR_{L-sys}$ , longitudinal peak systolic strain rate;  $SR_{L-E}$ , longitudinal peak early-diastolic strain rate;  $SR_{L-A}$ , longitudinal peak late-diastolic strain rate;  $DL$ , longitudinal peak displacement;  $DT$ , transverse peak displacement;  $\epsilon_{C-sys}$ , circumferential peak systolic strain;  $\epsilon_C$ , circumferential peak strain;  $\epsilon_{R-sys}$ , radial peak systolic strain;  $\epsilon_R$ , radial peak strain;  $SR_{C-sys}$ , circumferential peak systolic strain rate;  $SR_{C-E}$ , circumferential peak early-diastolic strain rate;  $SR_{C-A}$ , circumferential peak late-diastolic strain rate;  $SR_{R-sys}$ , radial peak systolic strain rate;  $SR_{R-E}$ , radial peak early-diastolic strain rate;  $SR_{R-A}$ , radial peak late-diastolic strain rate;  $DR$ , radial peak displacement.



**Table S6 – Segmental timing of peak strain in left ventricular long-axis and short-axis recordings under awake and anesthetized conditions**

| Variable        | Treatment    | Unit | Segments                   |                            |                           |                          |                           |                           | F-Test               |                     |                                    |
|-----------------|--------------|------|----------------------------|----------------------------|---------------------------|--------------------------|---------------------------|---------------------------|----------------------|---------------------|------------------------------------|
|                 |              |      | basSept<br>[mean ±<br>SEM] | midSept<br>[mean ±<br>SEM] | apSept<br>[mean ±<br>SEM] | apLat<br>[mean ±<br>SEM] | midLat<br>[mean ±<br>SEM] | basLat<br>[mean ±<br>SEM] | p value<br>Treatment | p value<br>Segments | p value<br>Treatment<br>× Segments |
| <b>LAX</b>      |              |      |                            |                            |                           |                          |                           |                           |                      |                     |                                    |
| t <sub>eL</sub> | Awake        | ms   | 318 ± 5                    | 297 ± 5                    | 278 ± 5                   | 286 ± 5                  | 321 ± 5                   | 338 ± 5                   | <0.001               | <0.001              | 0.052                              |
|                 | Anesthetized |      | 373 ± 5                    | 360 ± 5                    | 326 ± 5                   | 317 ± 5                  | 372 ± 5                   | 389 ± 5                   |                      |                     |                                    |
| <b>SAX-AP</b>   |              |      |                            |                            |                           |                          |                           |                           |                      |                     |                                    |
|                 |              |      | AntSept<br>[mean ±<br>SEM] | Ant<br>[mean ±<br>SEM]     | Lat<br>[mean ±<br>SEM]    | Post<br>[mean ±<br>SEM]  | Inf<br>[mean ±<br>SEM]    | Sept<br>[mean ±<br>SEM]   |                      |                     |                                    |
| t <sub>eC</sub> | Awake        | ms   | 311 ± 6                    | 314 ± 6                    | 283 ± 6                   | 281 ± 6                  | 270 ± 6                   | 293 ± 6                   | <0.001               | <0.001              | 0.001                              |
|                 | Anesthetized |      | 337 ± 6                    | 368 ± 7                    | 355 ± 7                   | 342 ± 7                  | 322 ± 6                   | 323 ± 6                   |                      |                     |                                    |
| t <sub>eR</sub> | Awake        | ms   | 314 ± 5                    | 296 ± 5                    | 292 ± 5                   | 301 ± 5                  | 307 ± 5                   | 313 ± 5                   | <0.001               | 0.001               | 0.445                              |
|                 | Anesthetized |      | 352 ± 5                    | 349 ± 5                    | 347 ± 5                   | 347 ± 5                  | 354 ± 5                   | 371 ± 5                   |                      |                     |                                    |
| <b>SAX-PM</b>   |              |      |                            |                            |                           |                          |                           |                           |                      |                     |                                    |
| t <sub>eC</sub> | Awake        | ms   | 303 ± 6                    | 338 ± 7                    | 298 ± 6                   | 282 ± 6                  | 277 ± 6                   | 290 ± 6                   | <0.001               | <0.001              | <0.001                             |
|                 | Anesthetized |      | 328 ± 6                    | 365 ± 6                    | 370 ± 6                   | 338 ± 6                  | 331 ± 6                   | 323 ± 6                   |                      |                     |                                    |
| t <sub>eR</sub> | Awake        | ms   | 309 ± 4                    | 302 ± 4                    | 290 ± 4                   | 289 ± 4                  | 292 ± 4                   | 304 ± 4                   | <0.001               | 0.075               | <0.001                             |
|                 | Anesthetized |      | 339 ± 4                    | 337 ± 4                    | 344 ± 4                   | 350 ± 4                  | 355 ± 4                   | 347 ± 4                   |                      |                     |                                    |
| <b>SAX-CH</b>   |              |      |                            |                            |                           |                          |                           |                           |                      |                     |                                    |
| t <sub>eC</sub> | Awake        | ms   | 297 ± 6                    | 339 ± 7                    | 334 ± 8                   | 294 ± 7                  | 282 ± 6                   | 294 ± 6                   | <0.001               | <0.001              | 0.045                              |
|                 | Anesthetized |      | 326 ± 6                    | 361 ± 6                    | 366 ± 7                   | 343 ± 8                  | 341 ± 6                   | 323 ± 6                   |                      |                     |                                    |
| t <sub>eR</sub> | Awake        | ms   | 329 ± 5                    | 320 ± 5                    | 313 ± 5                   | 315 ± 5                  | 319 ± 5                   | 330 ± 5                   | 0.078                | 0.484               | 0.112                              |
|                 | Anesthetized |      | 355 ± 5                    | 355 ± 5                    | 361 ± 5                   | 367 ± 5                  | 366 ± 5                   | 363 ± 5                   |                      |                     |                                    |

LAX, long axis view; SAX-AP, short axis view at apical level; SAX-PM, short axis view at papillary muscle level; SAX-CH, short axis view at chordal level; t<sub>eL</sub>, Time to peak longitudinal strain; t<sub>eC</sub>, Time to peak circumferential strain; t<sub>eR</sub>, Time to peak radial strain.
